# Supplementary material for: Knockout of Zebrafish Ovarian Aromatase Gene (cyp19a1a) by TALEN and CRISPR/Cas9 Leads to All-male Offspring Due to Failed Ovarian Differentiation
Source: PubMed Central journal article supplement (PMC5120357; doi:10.1038/srep37357), 2016-11-23
Supplement: srep37357-s1.pdf [file srep37357-s1.pdf]

## Supplementary figures and tables

### **Knockout of Zebrafish Ovarian Aromatase Gene (*cyp19a1a*) by TALEN and CRISPR/Cas9 Leads to All-male Offspring Due to Failed Ovarian Differentiation**

Esther Shuk-Wa LAU<sup>\*,2</sup>, Zhiwei ZHANG<sup>\*,1</sup>, Mingming QIN<sup>1</sup> and Wei GE<sup>1,2</sup>

<sup>1</sup> Centre of Reproduction, Development and Aging (CRDA), Faculty of Health Sciences,  
University of Macau, Taipa, Macau, China; <sup>2</sup>School of Life Sciences, The Chinese University of  
Hong Kong, Shatin, New Territories, Hong Kong, China

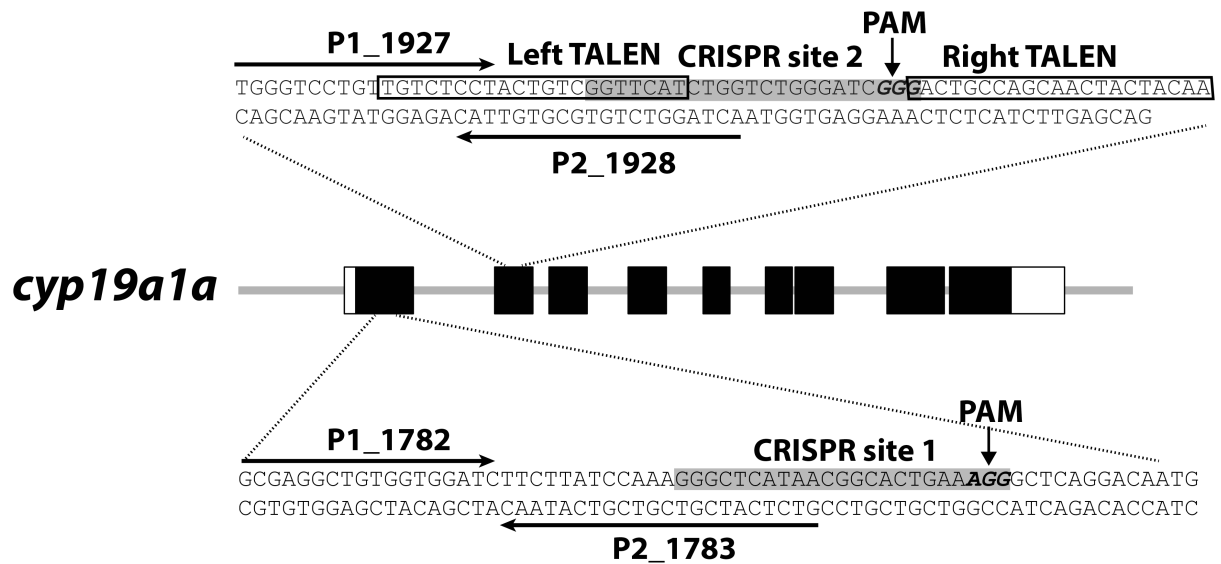

**Supplementary Figure 1.** Schematic representation of the zebrafish *cyp19a1a* genomic structure and the target sites of TALEN and CRISPR/Cas9. The solid boxes and open boxes represent coding and untranslated exon regions, respectively. The boxed sequences indicate the left and right TALEN binding sites, while the CRISPR sites are shadowed with the PAM sequence italicized. The primers (P1 and P2) used for HRMA and HMA are shown with arrows.

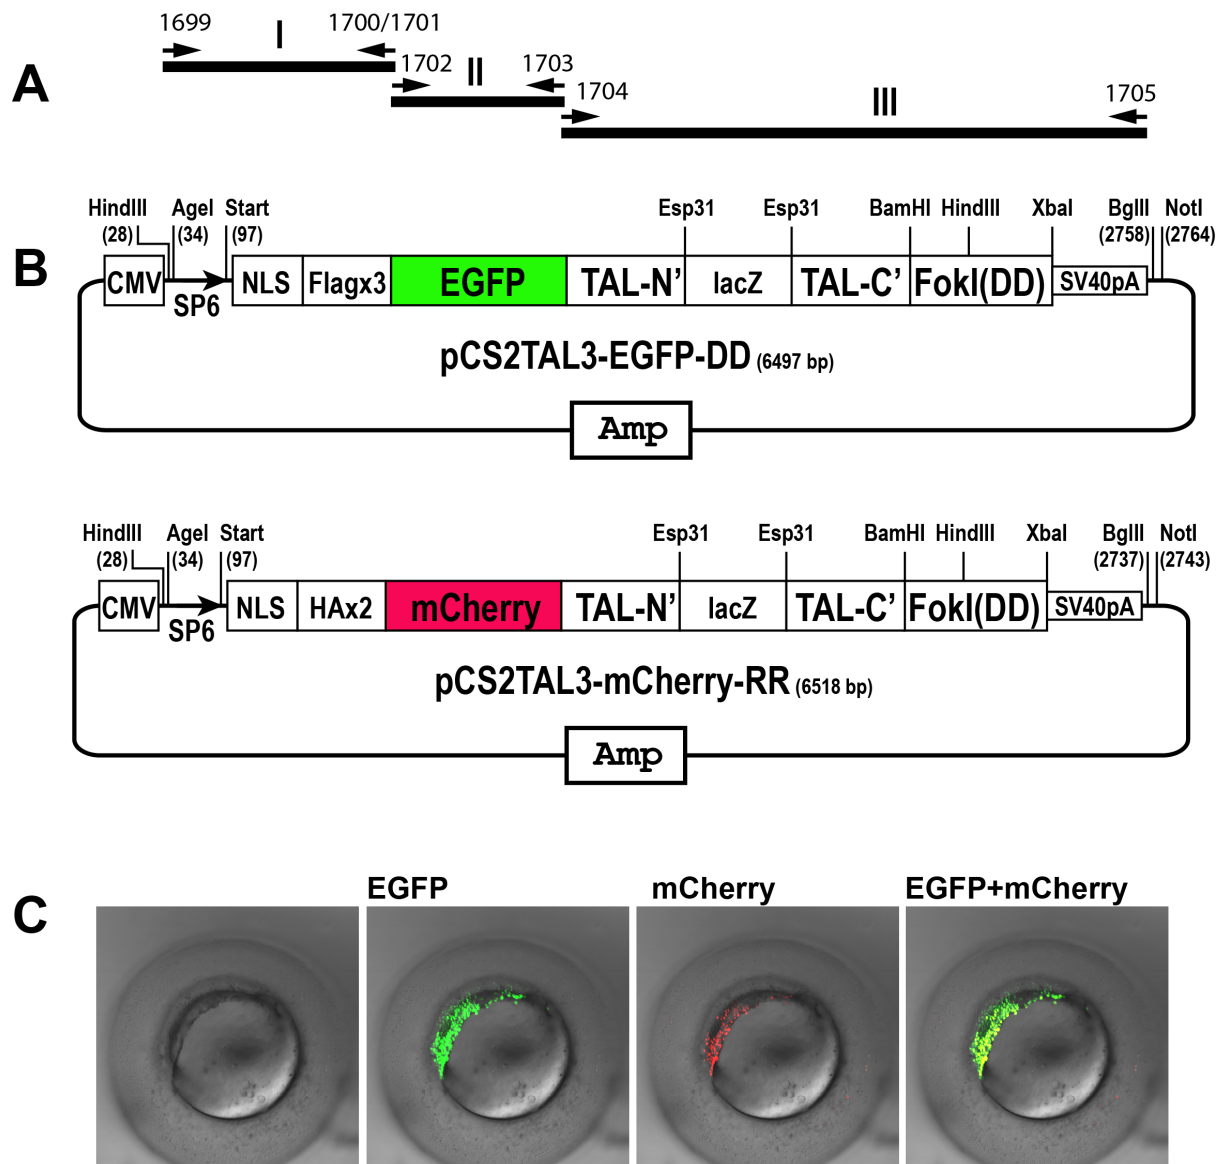

**Supplementary Figure 2.** Schematic representation of the EGFP and mCherry-tagged TALEN plasmids. A) The assembling strategy to insert EGFP and mCherry genes into the TALEN backbone plasmids. B) Structure of pCS2TAL3-EGFP-DD and pCS2TAL3-mCherry-RR. C). Embryos injected with *in vitro* transcribed mRNA of *cyp19a1a*-pCS2TAL3-EGFP-DD and *cyp19a1a*-pCS2TAL3-mCherry-RR. Both TALE proteins were translated and the yellow signal indicates co-translation of the proteins in the same cells.

Supplementary Table 1 Primers used in this study

| Targets                   | Names     | Sequences                                                   | Applications             |
|---------------------------|-----------|-------------------------------------------------------------|--------------------------|
| pCS2TAL3DD/<br>pCS2TAL3RR | 1699      | GGTGCGGTCTC <u>AAGCTT</u> <u>ACCGGT</u> GATTTAGGTGACACTATAG | Cloning                  |
|                           | 1700      | GGTGCGGTCTC <b><i>GGTACC</i></b> CTTGTCATCGTCATCC           |                          |
|                           | 1701      | GGTGCGGTCTC <b><i>GGTACC</i></b> ATGAGCAGCGTAATCTGG         |                          |
|                           | 1702      | GGTGCGGTCTC <b><i>GGTACC</i></b> ATGGTGAGCAAGGGCGAGGAG      |                          |
|                           | 1703      | GGTGCGGTCTCTCCACCTTGTACAGCTCGTCCATGCC                       |                          |
|                           | 1704      | GGTGCGGTCTCTGTGGATCTACGCACGCTCGGC                           |                          |
|                           | 1705      | GTGCGGTCTC <b><i>CGGCCG</i></b> CAGATCTGAATTAACCTCCACAC     |                          |
| <i>cyp19a1a</i> exon1     | 1782 (P1) | GCGAGGCTGTGGTGGATC                                          | HRMA, HMA                |
|                           | 1783 (P2) | CAGAGTAGCAGCAGCAGTATTG                                      |                          |
|                           | 1755 (P4) | CAAAGGAGCACACAAGGTACG                                       | DNA sequencing           |
|                           | 1756 (P5) | CAGCAGCAGGCAGAGTAGC                                         |                          |
| <i>cyp19a1a</i> exon2     | 1927 (P1) | TGGGTCCTGTTGTCTCCTAC                                        | HRMA, HMA                |
|                           | 1928 (P2) | TGATCCAGACACGCACAATG                                        |                          |
|                           | 1929 (P4) | AACTTTCTGGAAGCCCCAGC                                        | DNA Sequencing           |
|                           | 1930 (P5) | TGATGGTAGATGAACTGTCCCT                                      |                          |
|                           | 2001 (P3) | GTTTCATCTGGTCTGGGAT                                         | Semi-quantitative<br>PCR |
|                           | 1930 (P5) | TGATGGTAGATGAACTGTCCCT                                      |                          |
| <i>ef1a</i>               | 728       | GGCTGACTGTGCTGTGCTGATTG                                     | Semi-quantitative<br>PCR |
|                           | 729       | CTTGTCGGTGGGACGGCTAGG                                       |                          |

Underlined: BsaI site GGTCTC

Italic: HindIII site AAGCTT

Underlined and italic: AgeI site ACCGGT

Bold and italic: KpnI site GGTACC

Bold: BglII site CGGCCG

Full-length gels (Figure 1F)

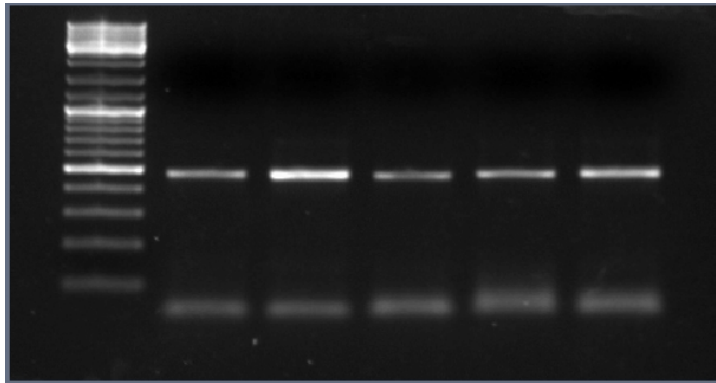

Figure 1F (P4+P5)

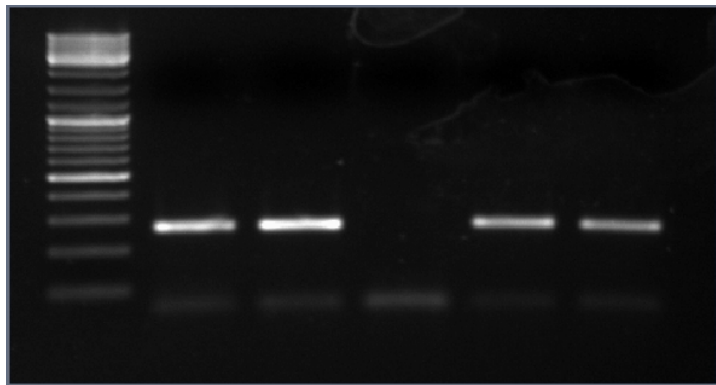

Figure 1F (P3+P5)

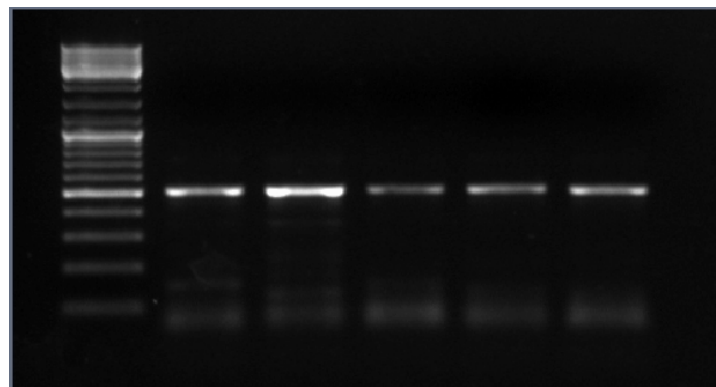

Figure 1F (*ef1a*)
